# Supplementary material for: A strategic neurological research agenda for Europe: Towards clinically relevant and patient‐centred neurological research priorities
Source: PubMed Central journal article supplement — Eur J Neurol. 2023 Dec 12;31(3):e16171. doi: 10.1111/ene.16171 (PMC11235625; doi:10.1111/ene.16171), 2023-12-12
Supplement: ENE-31-e16171-s003.pdf [file ENE-31-e16171-s003.pdf]

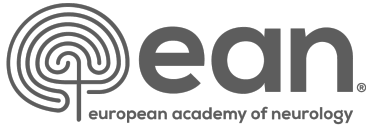

## EAN Strategic Research Agenda - Request for Input

### 1. We need your input to boost funding for brain research!

**The European Academy of Neurology's challenge is to translate neuroscience discoveries into improvements in care of neurological disorders to reduce the burden and improve global health. With its strategic research agenda EAN will set priorities to facilitate the direction of new discoveries, rather than just recommending areas for research. Fulfilling its mission EAN will support strategic research agendas in its 47 member countries aiming to translate basic and clinical discoveries into concrete actions able to prevent and treat neurological disorders, as well as to promote brain health. EAN is calling all relevant neuroscientific societies, neurological patient organizations and policymakers to support the implementation of its Strategic Research Agenda for advancing the relief of the burden of neurological disorders.**

**Please note: This questionnaire is designed to be filled out based on your membership of one Scientific Panel. If you are a member of more than one scientific panel, you may complete this questionnaire multiple times, i.e. fill it in based on the subspecialty area of each scientific panel for which you are a member.**

**If you have difficulties with completing this questionnaire please contact: [advocacy@ean.org](mailto:advocacy@ean.org)**

## EAN Strategic Research Agenda - Request for Input

### 2. Your Details

\* 1. Please enter your first name

\* 2. Please enter your last name

\* 3. Please select your EAN Scientific Panel

\* 4. Please select your role in the Scientific Panel

\* 5. Please enter your email address

6. Please enter your current country of residence/practice [Optional]

## EAN Strategic Research Agenda - Request for Input

### 3. Neurological Diseases requiring additional research

\* 7. Which are the neurological conditions that require additional research **with the highest priority** and that are covered by the Scientific Panel on {{ Q3 }}?

- Please enter least 1 answer or a maximum of 3.
- Please enter them in order of priority. 1=highest priority, 3=lowest priority.
- There is a limit of 100 characters per entry.

Neurological Disease  
1

Neurological Disease  
2

Neurological Disease  
3

8. Which are **high priority rare neurological diseases** that are covered by the Scientific Panel on {{ Q3 }}, if applicable?

- Please enter least 1 answer or a maximum of 3.
- Please enter them in order of priority. 1=highest priority, 3=lowest priority.
- There is a limit of 100 characters per entry.

Rare neurological  
disease 1

Rare neurological  
disease 2

Rare neurological  
disease 3

## EAN Strategic Research Agenda - Request for Input

### 4. Current Gaps/Needs in brain research

\* 9. Which are currently 3 main needs/gaps related to diseases covered by the Scientific Panel on {{ Q3 }} in understanding of mechanism(s), diagnostic gaps, treatment gaps, outcome and prediction of outcome gaps, and preventive gaps

- *Please enter least 1 answer or a maximum of 3.*
- *Please enter them in order of priority. 1=highest priority, 3=lowest priority.*
- *There is a limit of 300 characters per entry.*

Gap/Need 1

Gap/Need 2

GAP/Need 3
